# Supplementary material for: Advanced Classification of Ionospheric Troughs in the Morning and Evening Conditions
Source: MDPI journal article supplement (doi:10.3390/rs14164072), 2022-08-20
Supplement: s1 [file s1]

## Advanced separation and classification of ionospheric troughs in midnight conditions

Karpachev A.T.

### The model of the auroral oval of precipitation

The model of auroral particle precipitation is based on data from a large set of DMSP satellites in the Northern and Southern hemispheres [17]. The model is uploaded on the website of the Polar Geophysical Institute: <http://apm.pgia.ru>. Figure S1 shows this model for quiet conditions  $AL = -10$  nT,  $Dst = -5$  nT ( $Kp \sim 2$ ). As can be seen from Fig.S1, the model describes three main zones of auroral particle precipitation.

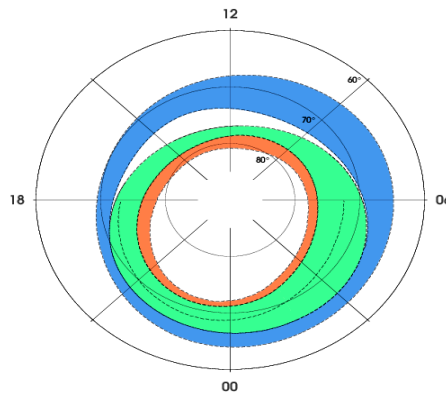

**Figure S1.** Model of auroral particle precipitation: diffuse auroral zone I equatorward of aurora (blue), structured auroral oval precipitation (auroral lights region or aurora, green), and soft diffuse precipitation zone II (orange) poleward of aurora.

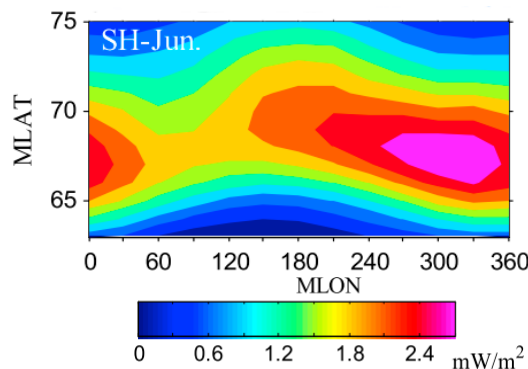

**Figure S2.** Longitudinal variations in the averaged auroral precipitation energy flux at 21 – 03 MLT under  $Kp = 2$  for the June solstice (Jun.) in southern hemisphere [18]. Note, that plot is presented in geomagnetic longitude MLON.

### References

- 17 Vorobjev, V.G.; Yagodkina, O.I. Effect of magnetic activity on the global distribution of auroral precipitation zones. *Geomagn. Aeron.* **2005**, *45*, 467–473.
- 18 Luan, X.; Wang, W.; Burns, A.; Solomon, S.; Zhang YPaxton, L.J.; Xu, J. Longitudinal variations of nighttime electron auroral precipitation in both the Northern and Southern hemispheres from the TIMED global ultraviolet imager. *J. Geophys. Res.* **2011**, *116*, A03302. <https://doi.org/10.1029/2010JA016051>.
